# Supplementary material for: Bimetallic platinum rhenium catalyst for efficient low temperature dehydrogenation of perhydro benzyltoluene
Source: Royal Society of Chemistry journal article supplement (doi:10.1039/d3cy01336g), 2024-01-01
Supplement: d3cy01336g1.pdf [file d3cy01336g1.pdf]

## Supporting Information:

### Bimetallic platinum rhenium catalyst for efficient low temperature dehydrogenation of perhydro benzyltoluene

Domenic Strauch,<sup>a,b</sup> Pia Weiner,<sup>b</sup> Bidyut Bikash Sarma,<sup>c,d</sup> Andreas Körner,<sup>a,b</sup> Elisabeth Herzinger,<sup>c</sup> Patrick Wolf,<sup>a</sup> Anna Zimina,<sup>c,d</sup> Andreas Hutzler,<sup>a</sup> Dmitry E. Doronkin,<sup>c,d</sup> Jan-Dierk Grunwaldt,<sup>c,d</sup> Peter Wasserscheid,<sup>a,b</sup> Moritz Wolf\*<sup>,c,e</sup>

- Helmholtz Institute Erlangen-Nürnberg for Renewable Energy (IEK-11), Forschungszentrum Jülich GmbH, Cauerstr. 1, 91058 Erlangen, Germany.
- Friedrich-Alexander-Universität Erlangen-Nürnberg (FAU), Lehrstuhl für Chemische Reaktionstechnik (CRT), Egerlandstr. 3, 91058 Erlangen, Germany.
- Karlsruhe Institute of Technology, Institute of Catalysis Research and Technology, Hermann-von-Helmholtz-Platz 1, 76344 Eggenstein-Leopoldshafen, Germany.
- Karlsruhe Institute of Technology, Institute for Chemical Technology and Polymer Chemistry, Engesserstr. 20, 76131 Karlsruhe, Germany.
- Karlsruhe Institute of Technology, Engler-Bunte-Institute, Engler-Bunte-Ring 1, 76131 Karlsruhe, Germany.

\*Corresponding author. E-mail address: moritz.wolf@kit.edu

### Supporting Table

Table S1 Sequential drying program of set pressures for the rotary evaporation of solvents at 50 °C during preparation of the catalysts.

| Sequence | Starting pressure / mbar | Final pressure / mbar | Time range / min |
|----------|--------------------------|-----------------------|------------------|
| 1        | 140                      | 100                   | 10               |
| 2        | 100                      | 80                    | 20               |
| 3        | 80                       | 40                    | 120              |
| 4        | 40                       | 20                    | 30               |

## Supporting Figures

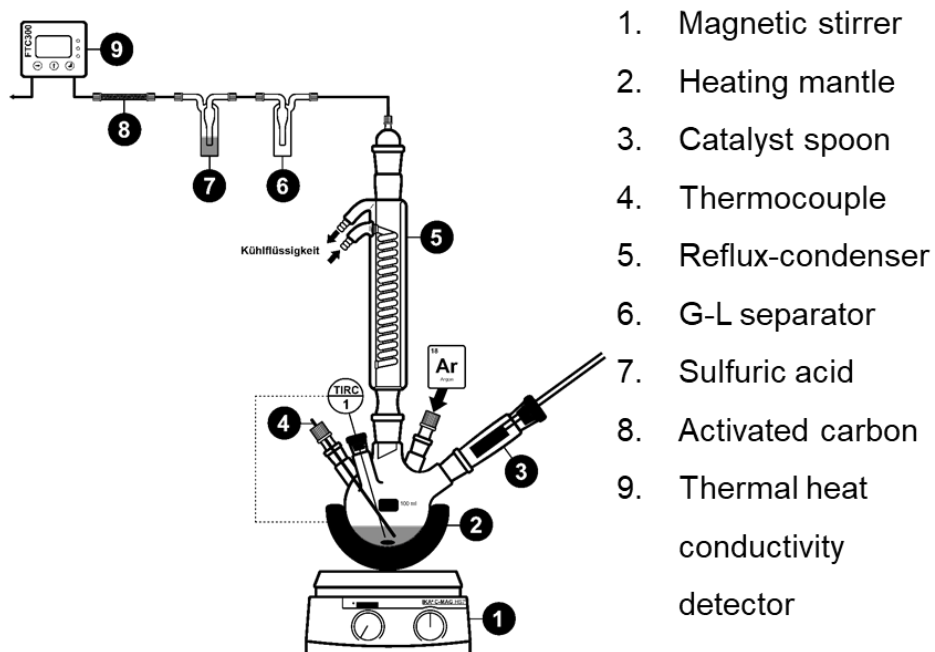

Figure S1: Schematic of the dehydrogenation set-up for semi-batch experiments in a 100 mL five-neck round-bottom flask.

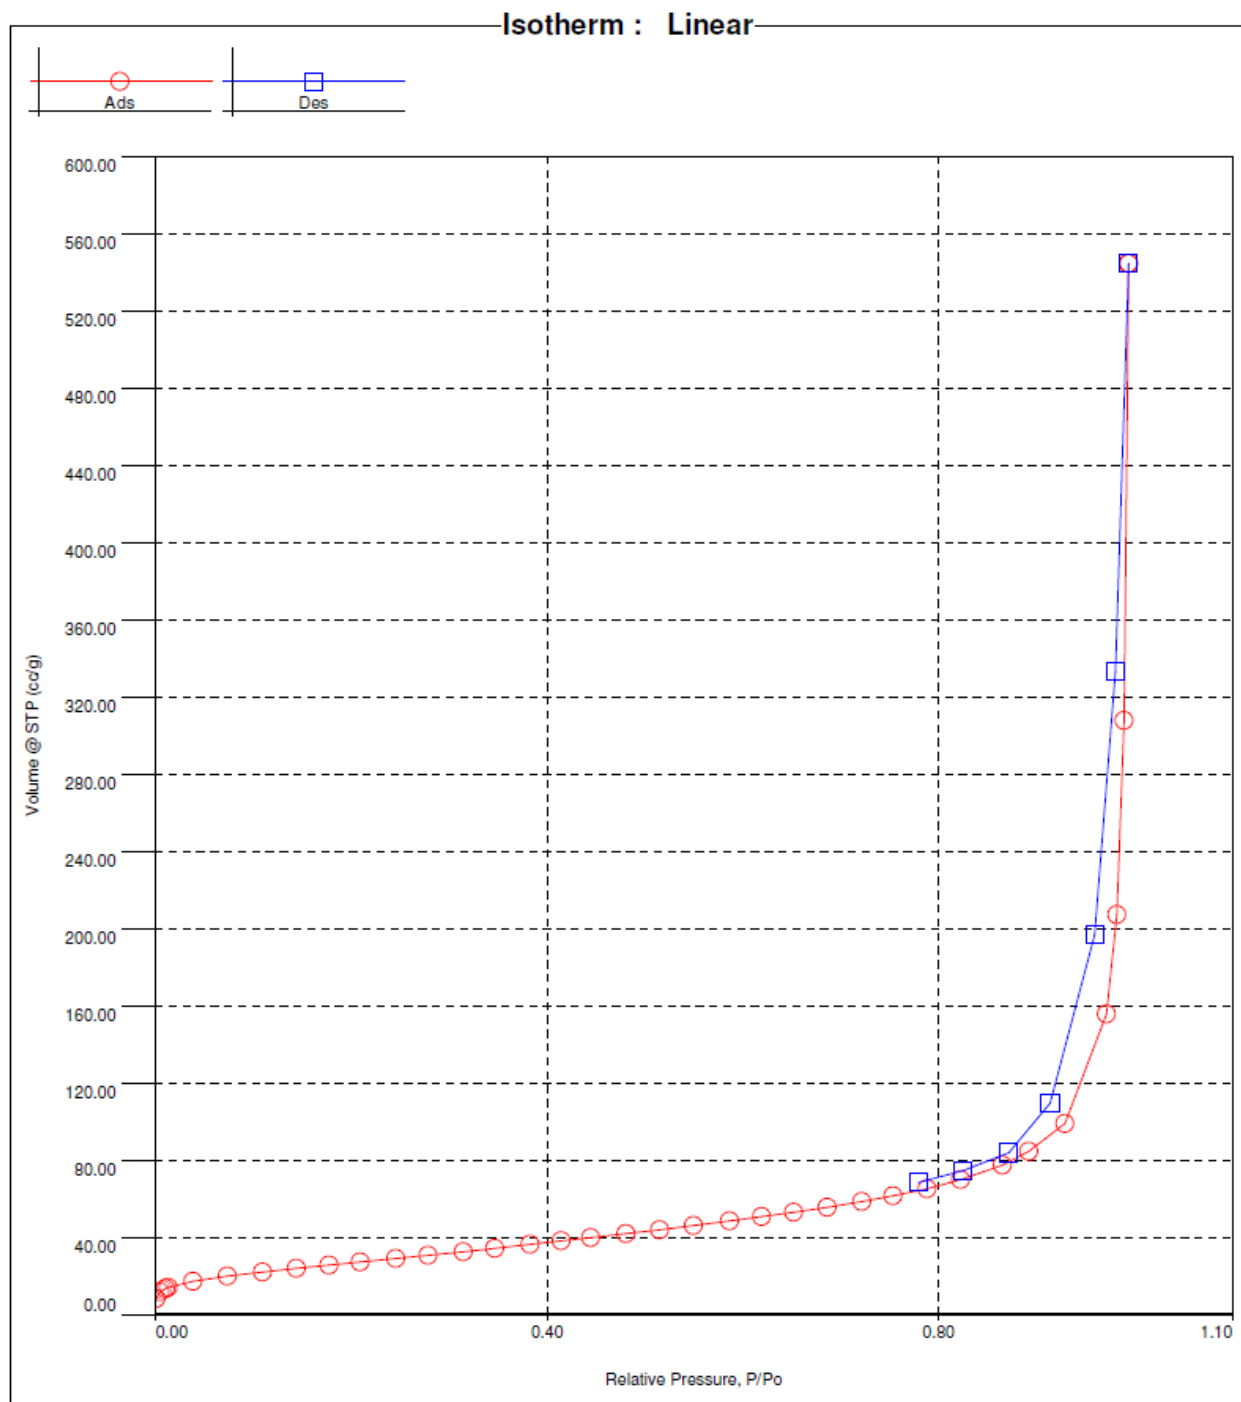

Figure S2: N<sub>2</sub> physisorption isotherms of the prepared alumina support material for BET and BJH analysis.

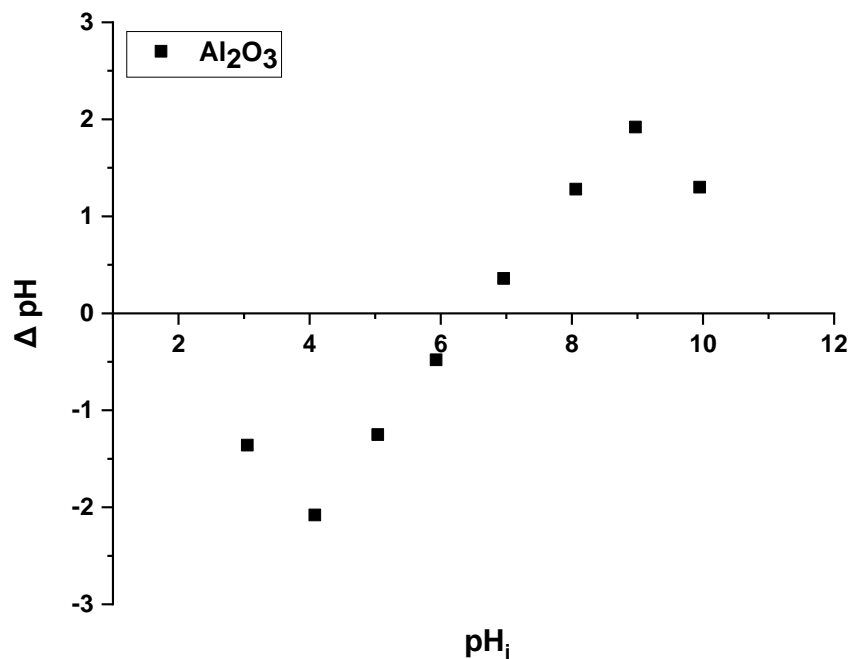

Figure S3: Point of zero charge for the prepared  $\gamma$ -Al<sub>2</sub>O<sub>3</sub> support.

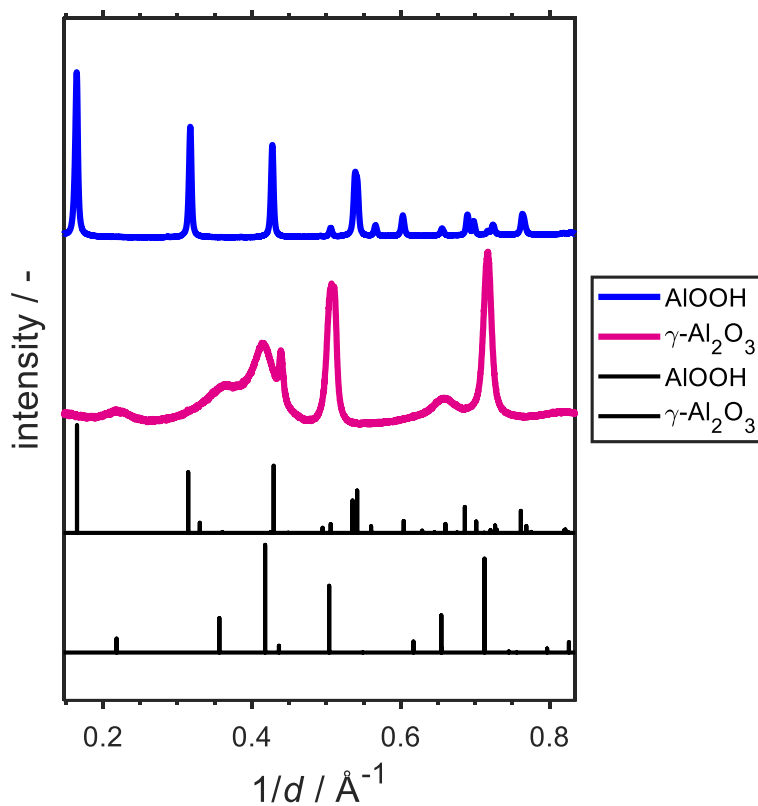

Figure S4: X-ray diffractograms of the as received boehmite precursor and of the calcined sample yielding alumina with references for AlOOH (COD-ID 9012247) and  $\gamma$ -Al<sub>2</sub>O<sub>3</sub> (COD-ID 2015530).

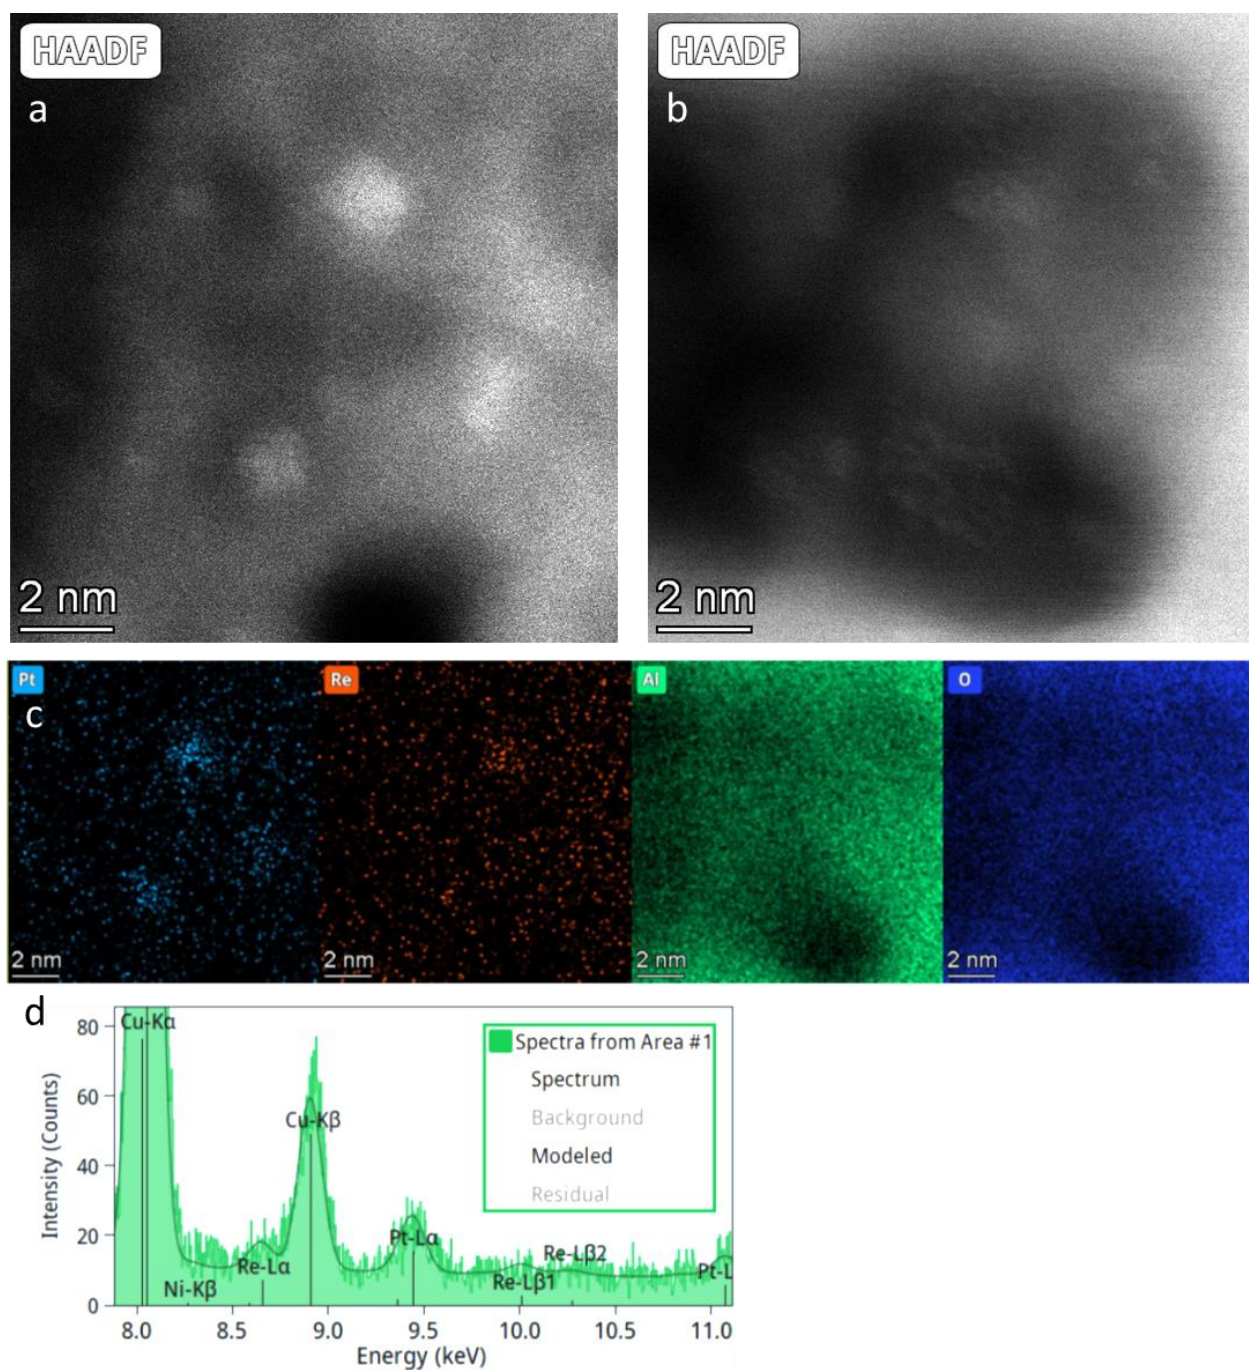

Figure S5: High-angle annular dark field scanning transmission electron micrographs (a) before and (b) after elemental mapping via energy-dispersive X-ray spectroscopy of catalyst Pt-Re 1:0.5 exhibiting sample damage of the Al<sub>2</sub>O<sub>3</sub> support due to prolonged beam exposure. Note, that (c) elemental maps of Pt, Re, Al, and O and (d) the representative spectrum have to be considered with care due to identified sample damage even though the measured Al:O ratio of 2:2.97 is in good agreement with the expected ratio of 2:3.

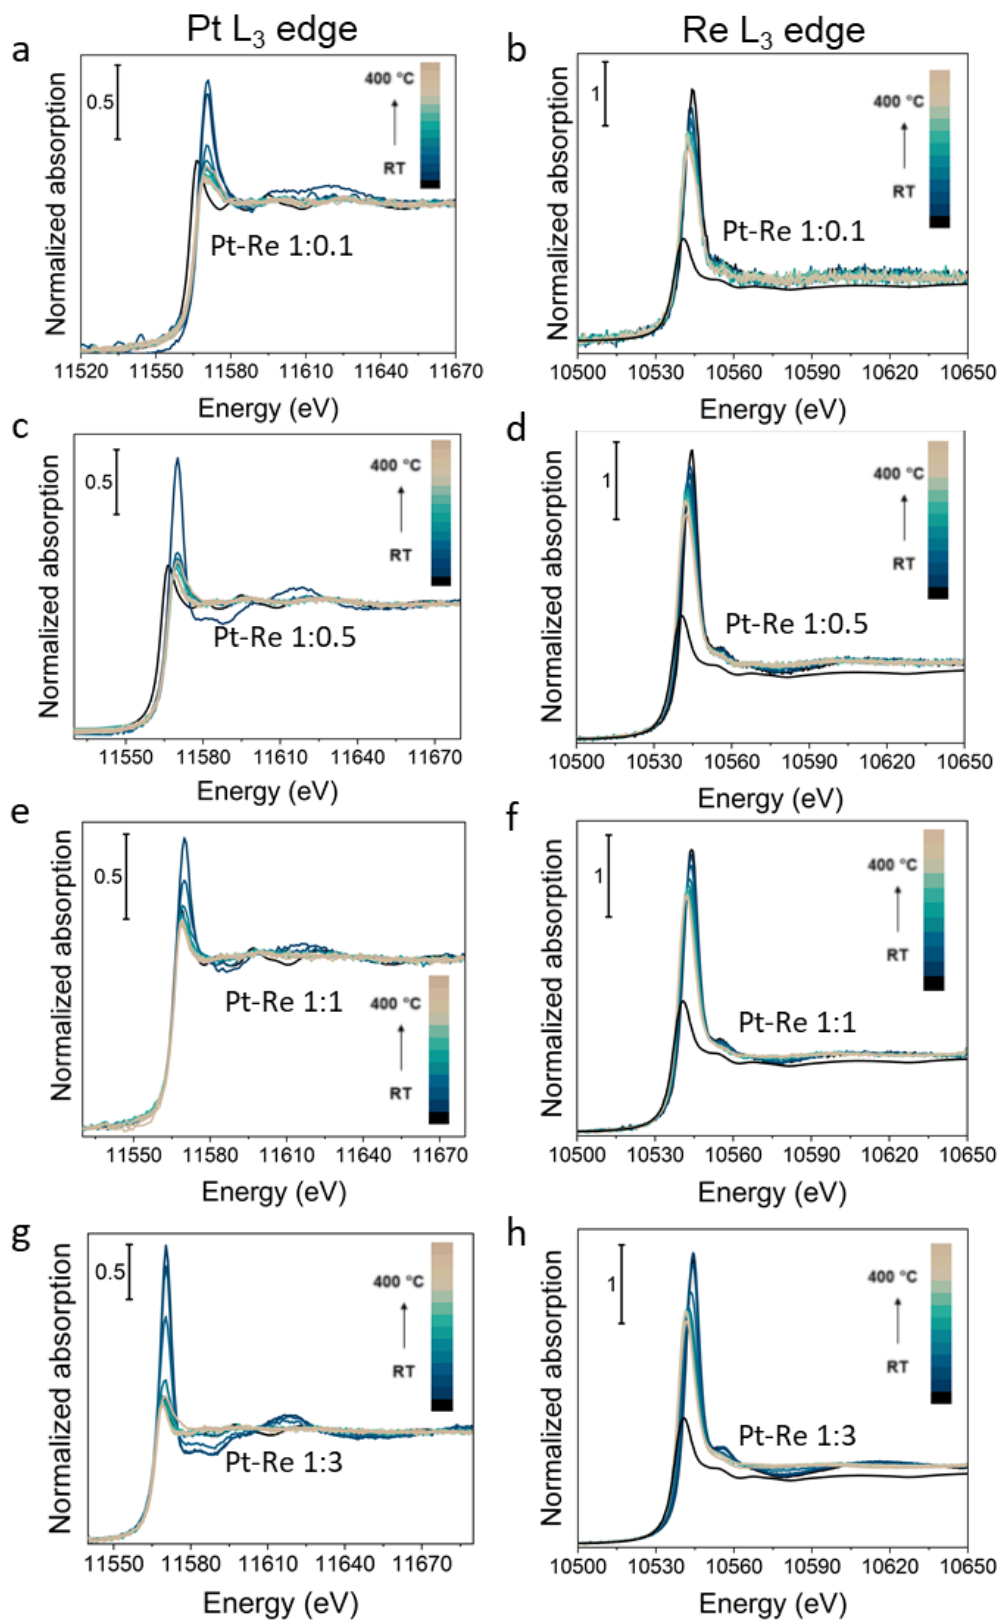

Figure S6: Comparison of *in situ* X-ray absorption near edge spectra at (a, c, e, g) the Pt and (b, d, f, h) Re L<sub>3</sub> edge during reduction of bimetallic Pt-Re catalysts at 400 °C with a heating rate of 10 °C min<sup>-1</sup> in 11% H<sub>2</sub>/He. Pt and Re foil (black lines) are added as references.

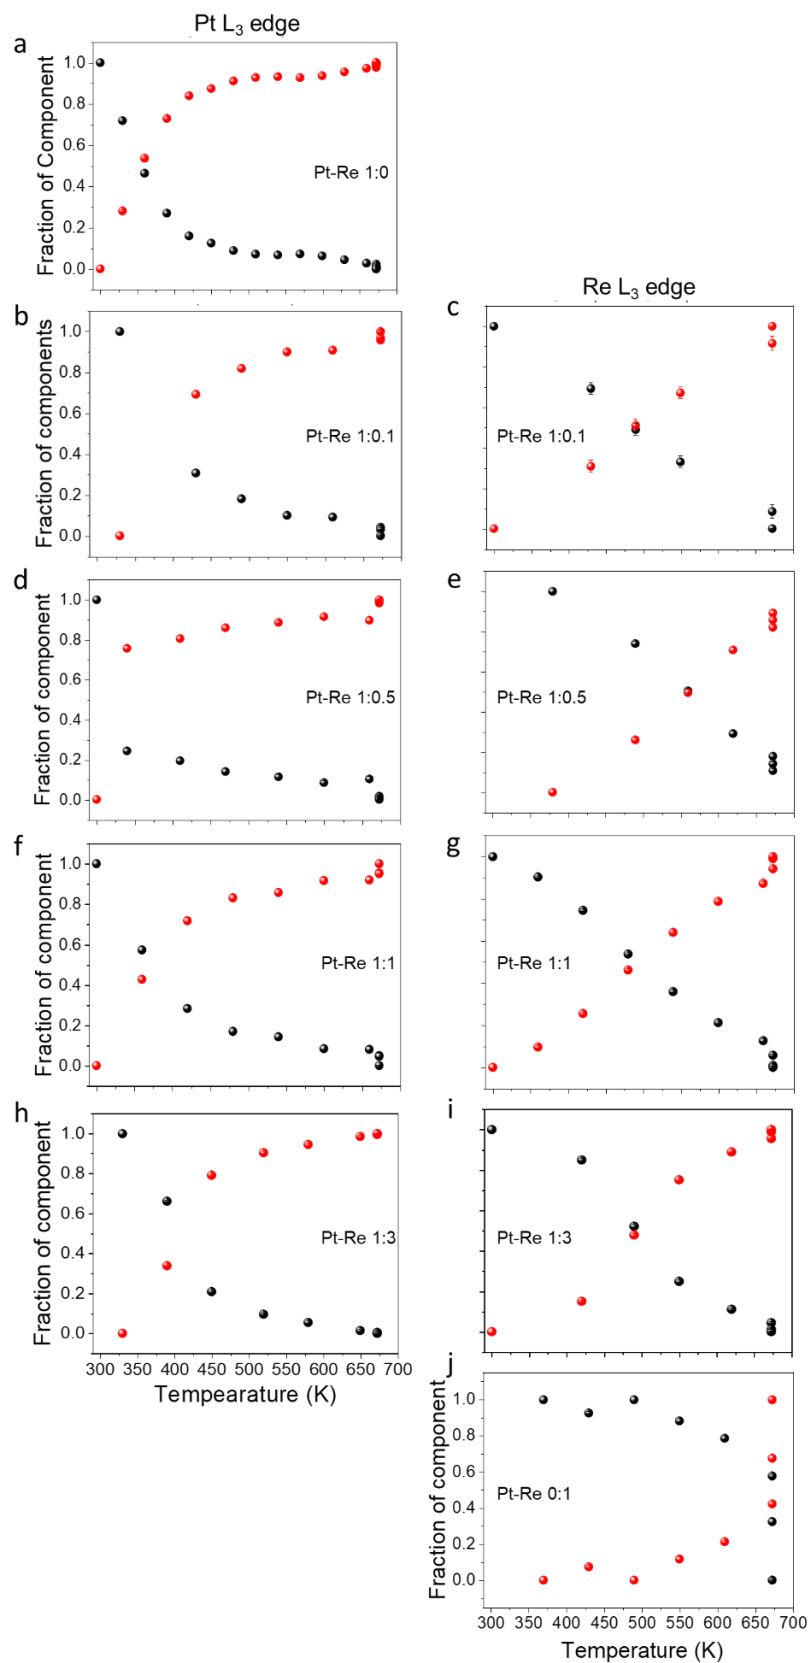

Figure S7: Linear combination analysis of X-ray absorption near edge structure spectra at the Pt (a, b, d, f, g) and Re L<sub>3</sub> edges (c, e, g, i, j) during TPR using the component of the first (black) and the last spectrum (red) recorded as internal reference.

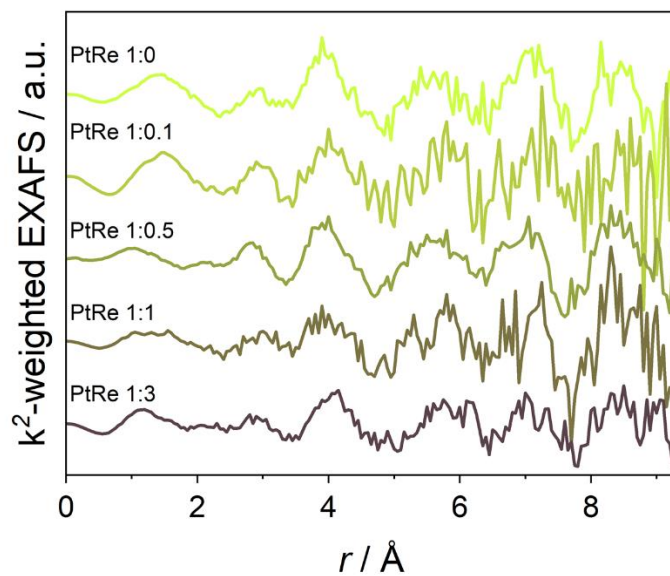

Figure S8: EXAFS spectra (Pt L<sub>3</sub> edge) of the bimetallic Pt-Re catalysts with various ratios after reduction at 400 °C for 30 min with 10 °C min<sup>-1</sup> in 11% H<sub>2</sub>/He. Spectra were acquired after cool-down to room temperature in 11% H<sub>2</sub>/He.



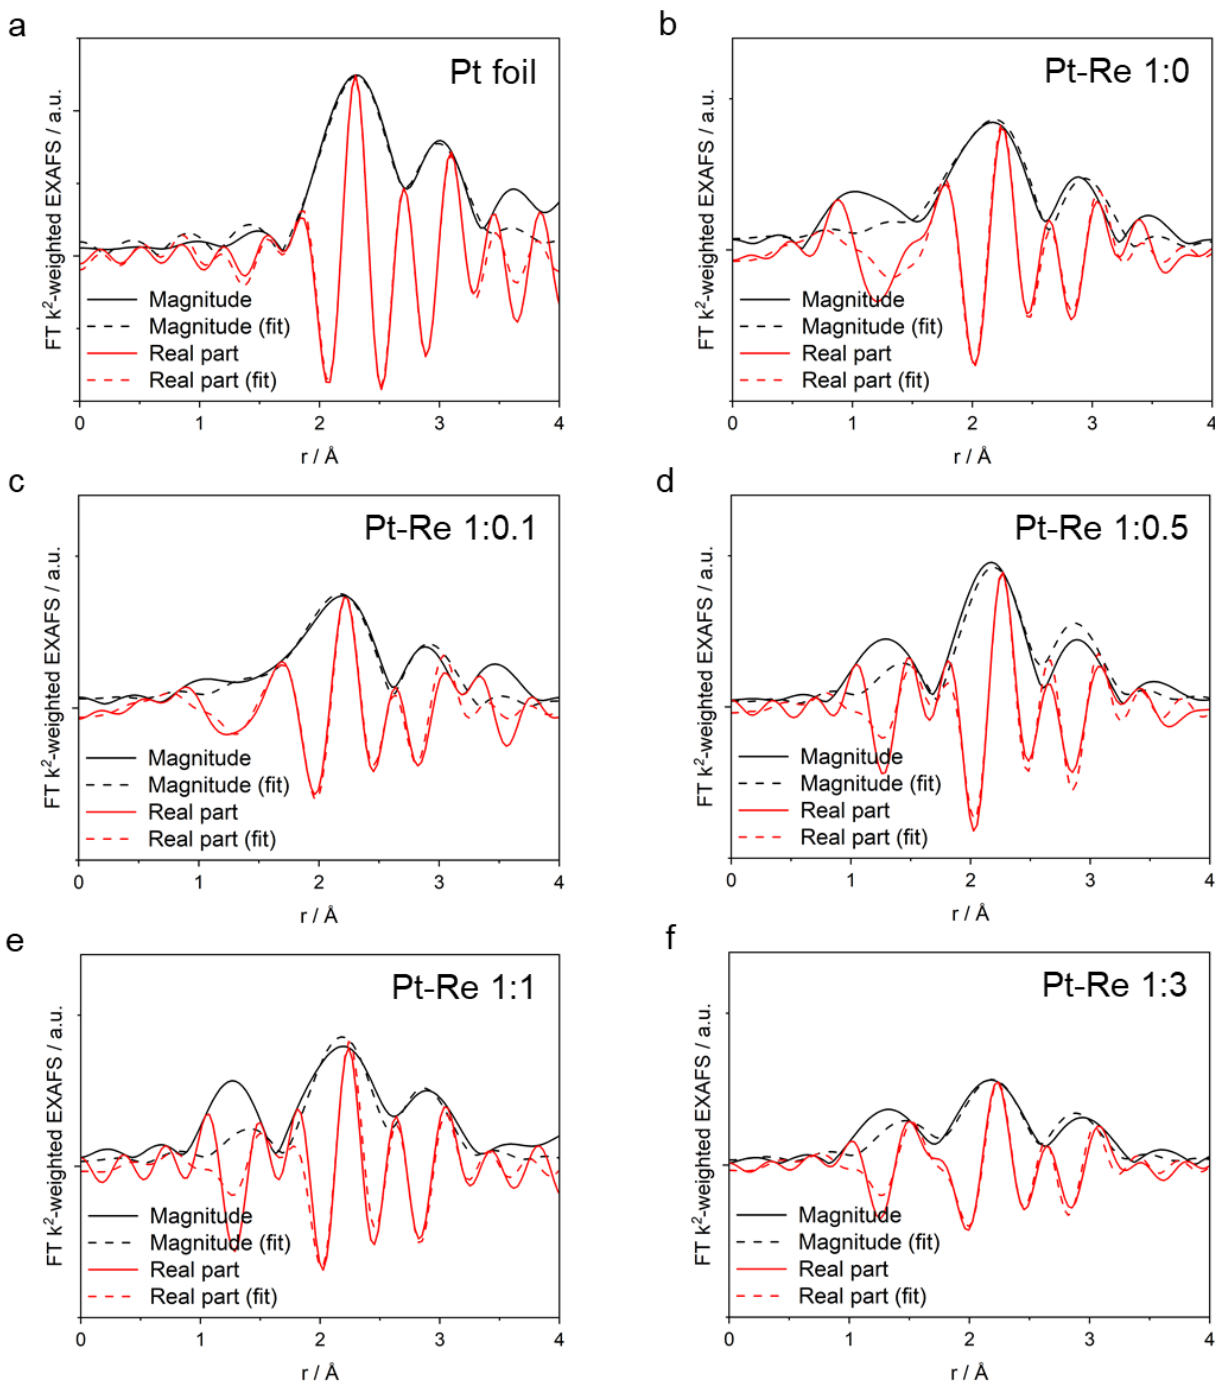

Figure S9: Fits of the Fourier-transformed EXAFS spectra (Pt  $L_3$  edge) of (a) Pt foil and (b-f) the bimetallic Pt-Re catalysts with various ratios after reduction at 400 °C for 30 min with 10 °C min<sup>-1</sup> in 11% H<sub>2</sub>/He. Spectra were acquired after cool-down to room temperature in 11% H<sub>2</sub>/He.

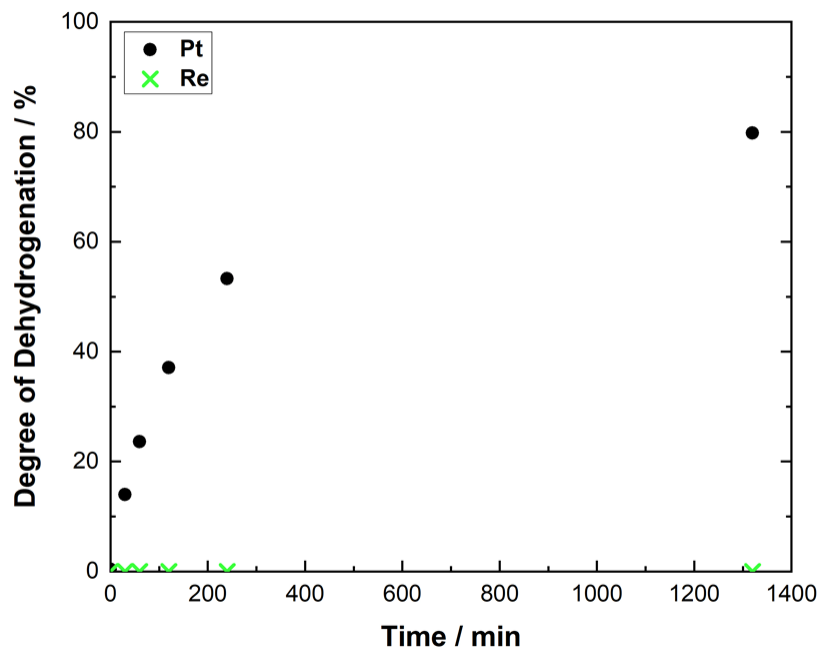

Figure S10: Degree of dehydrogenation during H<sub>2</sub> release from H12-BT using monometallic catalysts. Reaction conditions: 250 °C, 1 atm, 0.0001 mol<sub>Pt</sub> mol<sup>-1</sup><sub>LOHC</sub>, 31.01 g<sub>H12-BT</sub>, 0.30 wt.% or Pt, 0.30 wt.% Re, 1320 min, 0 mL<sub>Ar</sub> min<sup>-1</sup>. Calculations according to Equation (5) in manuscript based on GC-FID analysis of liquid samples.

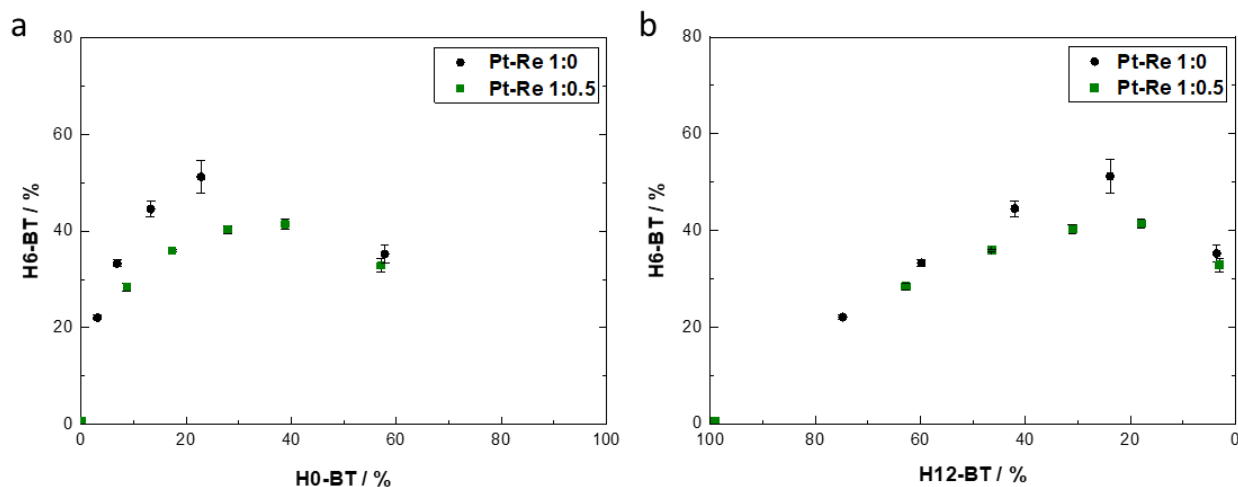

Figure S11: Relationship between the fraction of H6-BT and (a) the fraction of H0-BT or (b) formed H12-BT during H<sub>2</sub> release from H12-BT using monometallic Pt-Re 1:0 and bimetallic Pt-Re 1:0.5 catalysts. Reaction conditions: 250 °C, 1 atm, 0.0001 mol<sub>Pt</sub> mol<sup>-1</sup><sub>LOHC</sub>, 31.01 g<sub>H12-BT</sub>, 0.30 wt.% Pt, 0 or 0.15 wt.% Re, 1320 min, 300 mL<sub>Ar</sub> min<sup>-1</sup>. Calculation based on GC-FID analyses of liquid samples.

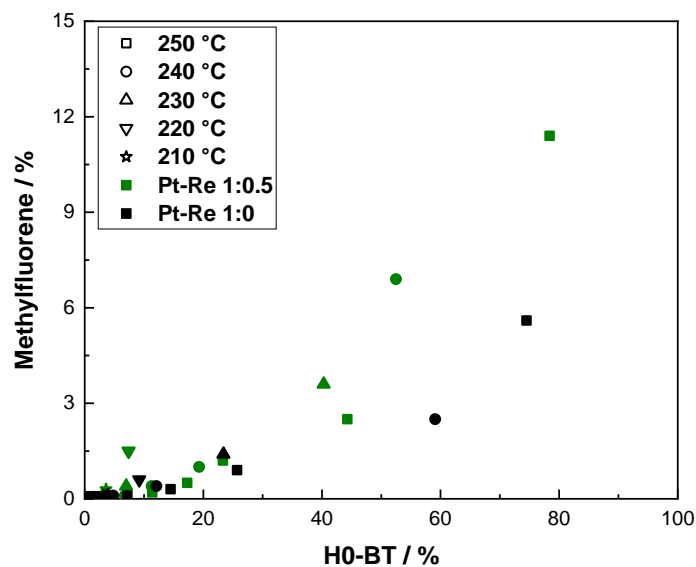

Figure S12: Formation of methylfluorene during H<sub>2</sub> release from H12-BT at various temperatures using monometallic Pt-Re 1:0 and bimetallic Pt-Re 1:0.5 catalysts. Reaction conditions: 210-250 °C, 1 atm, 0.0001 mol<sub>Pt</sub> mol<sup>-1</sup><sub>LOHC</sub>, 31.01 g<sub>H12-BT</sub>, 0.30 wt.% Pt, 0 or 0.15 wt.% Re, 240 min, 300 mL<sub>Ar</sub> min<sup>-1</sup>. Calculation based on GC-FID analyses of liquid samples.

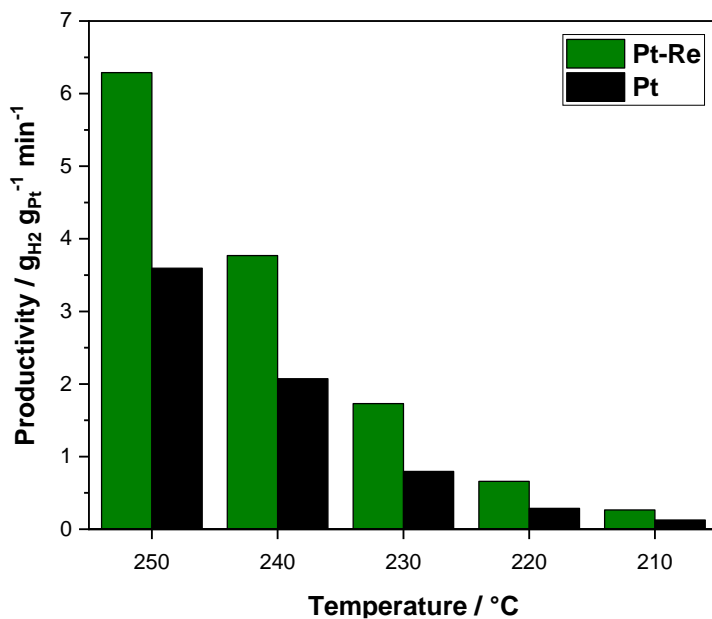

Figure S13: Productivity of Pt during H<sub>2</sub> release from H12-BT at various temperatures using monometallic Pt-Re 1:0 and bimetallic Pt-Re 1:0.5 catalysts. Reaction conditions: 210-250 °C, 1 atm, 0.0001 mol<sub>Pt</sub> mol<sup>-1</sup><sub>LOHC</sub>, 31.01 g<sub>H12-BT</sub>, 0.30 wt.% Pt, 0 or 0.15 wt.% Re, 240 min, 300 mL<sub>Ar</sub> min<sup>-1</sup>. Calculation based on TCD measurements of H<sub>2</sub> release.
